# Supplementary material for: Group IIA secreted phospholipase A2 controls skin carcinogenesis and psoriasis by shaping the gut microbiota
Source: JCI journal article supplement (doi:10.1172/jci.insight.152611), 2022-01-24
Supplement: sd1 [file 1]

You are being redirected.
